Full Title:

**Functional cyclic AMP signalling is required for the actions of IP<sub>3</sub> on the Ca<sup>2+</sup> transient in cardiac atria and beating rate in sino-atrial node**

Short Title:

**IP<sub>3</sub> and cAMP signalling in cardiac atrial myocytes**

Keywords:

Inositol trisphosphate, adenylyl cyclase, cyclic AMP, sino-atrial node, cardiac atria, atrial myocytes, Ca<sup>2+</sup> signalling, signal transduction, heart rate, phenylephrine

Table of contents category:

Cardiovascular

Author List:

Rebecca A Capel<sup>1</sup>, Thomas P Collins<sup>1</sup>, Samuel J Bose<sup>1</sup>, Skanda Rajasundaram<sup>1</sup>, Thamali Ayagama<sup>1</sup>, Manuela Zaccolo<sup>2</sup>, Rebecca AB Burton<sup>1\*+</sup>, Derek A Terrar<sup>1\*</sup>

\*Joint senior authors, +corresponding author

Authors' email addresses:

[rebecca.capel@pharm.ox.ac.uk](mailto:rebecca.capel@pharm.ox.ac.uk)

[t.collins@wellcome.ac.uk](mailto:t.collins@wellcome.ac.uk)

[samuel.bose@pharm.ox.ac.uk](mailto:samuel.bose@pharm.ox.ac.uk)

[skanda.rajasundaram@lincoln.ox.ac.uk](mailto:skanda.rajasundaram@lincoln.ox.ac.uk)

[thamali.ayagama@pharm.ox.ac.uk](mailto:thamali.ayagama@pharm.ox.ac.uk)

[manuela.zaccolo@dpag.ox.ac.uk](mailto:manuela.zaccolo@dpag.ox.ac.uk)

[rebecca.burton@pharm.ox.ac.uk](mailto:rebecca.burton@pharm.ox.ac.uk)

[derek.terrar@pharm.ox.ac.uk](mailto:derek.terrar@pharm.ox.ac.uk)

Postal address for all authors:

<sup>1</sup>Department of Pharmacology, British Heart Foundation Centre of Research Excellence, University of Oxford, Mansfield Road, Oxford, Oxon, OX1 3QT

<sup>2</sup>Department of Physiology, Anatomy and Genetics, University of Oxford, Parks Road, OX1 3PT

## Abstract

Inositol trisphosphate (IP<sub>3</sub>) is a major Ca<sup>2+</sup>-mobilising second messenger and atrial IP<sub>3</sub> receptor (IP<sub>3</sub>R) expression is greatly increased in atrial fibrillation (AF). Cardiac atrial and sino-atrial node myocytes also express Ca<sup>2+</sup>-stimulated adenylyl cyclases (AC1 and AC8); however the physiological pathways underlying AC1 and AC8 activation are not known. We investigated whether IP<sub>3</sub> signalling in cardiac atria and sino-atrial node utilises ACs. Immunocytochemistry in isolated guinea pig atrial myocytes showed type 2 IP<sub>3</sub>Rs co-localised with AC8, while AC1 was located in close vicinity. UV photorelease of IP<sub>3</sub> significantly enhanced Ca<sup>2+</sup> transient amplitudes following stimulation of atrial myocytes (31 ± 6 % increase 60 s post photorelease, n=16), an effect abolished by 3 µmol/L MDL-12,330 (MDL), to inhibit ACs, or 1 µmol/L H89, to inhibit PKA. The maximum rate change observed in spontaneously-beating murine right atrial preparations exposed to phenylephrine (14.7 ± 0.5 %, n=10) was significantly reduced by 2.5 µmol/L 2-APB (to 4.7 ± 0.2 %, n=7, *P*<0.05 compared to control) and abolished by a low dose of MDL (1 µmol/L, n=5). These observations are consistent with a functional interaction between IP<sub>3</sub> and cAMP signalling involving Ca<sup>2+</sup> stimulation of ACs in cardiac atria and sino-atrial node. Structural evidence supports AC8 as the most likely effector. This signal transduction mechanism is important for future study in atrial physiology and pathophysiology, particularly AF.

## Introduction

Calcium handling in the heart is vital to normal physiological function, arising from the interaction of multiple, highly regulated, calcium signalling pathways. The atrial and ventricular chambers of the heart have very different functions and therefore it is not surprising that there are many differences between atrial and ventricular myocytes in excitation-contraction coupling and in the handling of  $\text{Ca}^{2+}$  ions by different intracellular compartments. One characteristic feature of atrial myocytes is the relative abundance of receptors for inositol trisphosphate ( $\text{IP}_3$ ) compared with ventricular myocytes (Lipp *et al.*, 2000).  $\text{IP}_3$  is a  $\text{Ca}^{2+}$ -mobilising second messenger (Berridge & Irvine, 1984) which acts to open  $\text{IP}_3$  receptors ( $\text{IP}_3\text{R}$ ), located on the sarcoplasmic reticulum (SR) of cardiomyocytes (Lipp *et al.*, 2000; Mackenzie *et al.*, 2002).  $\text{IP}_3$  is positively inotropic in atrial (Lipp *et al.*, 2000) and ventricular (Nosek *et al.*, 1986) preparations, and is positively chronotropic in the sino-atrial node (Ju *et al.*, 2011; Kapoor *et al.*, 2015).  $\text{IP}_3$  is synthesised upon stimulation of phospholipase C (PLC), commonly but not exclusively by G-protein coupled receptors associated with Gq (Rhee, 2001). In cardiac myocytes endothelin-1 (ET-1), angiotensin II (Ang-II) and phenylephrine (PE) all increase intracellular  $\text{IP}_3$  level (Remus *et al.*, 2006) via their actions at the Gq-coupled ET-A, Ang-II and  $\alpha$ -adrenergic receptors respectively.

Early functional studies revealed a much greater effect of  $\text{IP}_3$ -associated stimuli on the contractility of atrial preparations than upon their ventricular counterparts (Moravec *et al.*, 1989) and expression of  $\text{IP}_3\text{R}$  type 2 ( $\text{IP}_3\text{R}2$ ) is now known to be at least six times greater in atrial myocytes (Lipp *et al.*, 2000).  $\text{IP}_3\text{R}$  expression is significantly increased during atrial fibrillation in both human patients (Yamada *et al.*, 2001) and animal models (Zhao *et al.*, 2007). Further, inhibiting Gq-coupled AngII receptors has been shown to prevent the early remodelling associated with rapid atrial pacing (Nakashima *et al.*, 2000). Patently, this evidence demonstrates that understanding the functions and underlying physiology of the  $\text{IP}_3$  pathway is particularly important in the cardiac atria.

In healthy atrial myocytes, Gq-associated signalling causes an  $\text{IP}_3\text{R}$ -dependent increase in the  $\text{Ca}^{2+}$  spark rate of quiescent myocytes and amplitude of the stimulated  $\text{Ca}^{2+}$  transient and  $\text{Ca}^{2+}$  current (Gassanov *et al.*, 2006), effects matched on direct application of  $\text{IP}_3$  (Lipp *et al.*, 2000; Liang *et al.*, 2009). Interestingly, even in healthy cells,  $\text{IP}_3$ -dependent stimulation can be associated with the generation of spontaneous diastolic  $\text{Ca}^{2+}$  events (Lipp *et al.*, 2000; Mackenzie *et al.*, 2002).

Adenylyl cyclase (AC) enzymes catalyse the production of cAMP. cAMP, in turn, activates PKA and, in the sino-atrial node, also directly regulates the funny current I(f) (DiFrancesco & Tortora, 1991). AC5/6 are the predominant AC isoforms traditionally associated with cardiac myocytes (Guellich *et al.*, 2014), but atrial and sino-atrial node myocytes also express the Ca<sup>2+</sup>-stimulated isoforms AC1 and AC8 (Mattick *et al.*, 2007). Chelation of intracellular Ca<sup>2+</sup> using BAPTA, or inhibition of ACs using MDL-12,330 (MDL), reduces I(f) in guinea pig sino-atrial node myocytes by shifting the voltage of half-activation to more hyperpolarised voltages; an effect consistent with changes in cellular cAMP. This effect of BAPTA on I(f) is reversed by direct stimulation of ACs using forskolin but is not potentiated by further inhibition of ACs using MDL, consistent with the hypothesis that cAMP from Ca<sup>2+</sup>-dependent ACs affects I(f) under physiological conditions in cardiac pacemaker cells (Mattick *et al.*, 2007). Similarly, in guinea pig atrial myocytes BAPTA and MDL reduce peak I<sub>CaL</sub> amplitude and the effect of BAPTA is abolished when it is applied in the presence of forskolin or high concentrations of patch-applied cAMP (Collins & Terrar, 2012). The effects of BAPTA appear to be calmodulin, but not CaMKII, dependent (Rigg *et al.*, 2003), consistent with the known Ca<sup>2+</sup>-dependent activation mechanism of ACs 1 and 8 (Tang *et al.*, 1991; Simpson *et al.*, 2006). Further, expression of Ca<sup>2+</sup>-stimulated AC1 enhances beating rate in HCN2-mediated ‘biological pacemakers’ (Boink *et al.*, 2012).

Considering the above lines of evidence, we sought to investigate the importance of cellular cAMP generation to the effect of IP<sub>3</sub>-dependent signals in the atria and sino-atrial node.

## Methods

All work detailed herein complies with the “Principles and standards for reporting animal experiments” (Grundy, 2015) and the Animals (Scientific Procedures) Act 1986 (UK).

### *Atrial myocyte isolation*

Male Dunkin Hartley guinea pigs (350-550g, Envigo or B&K Universal) were housed and maintained in a 12 h light-dark cycle with *ad libitum* access to standard diet and sterilised water. Guinea-pigs were culled by cervical dislocation in accordance with Home Office Guidance on the Animals (Scientific Procedures) Act (1986). Atrial myocytes were isolated following the method of Collins et al. (2011) and stored at 4°C in a high potassium medium containing (in mmol/L): KCl 70, MgCl<sub>2</sub> 5, K<sup>+</sup> glutamine 5, taurine 20, EGTA 0.1, succinic acid 5, KH<sub>2</sub>PO<sub>4</sub> 20, HEPES 5, glucose 10; pH to 7.2 with KOH. Healthy atrial myocytes were identified on the basis of morphology.

### *Immunocytochemistry*

Immunocytochemistry staining and analysis was carried out using the method of Collins and Terrar (2012). AC1 (sc25743) and AC8 (sc32128) primary antibodies were purchased commercially (Santa Cruz Biotechnology) and used at a dilution of 1:200. IP<sub>3</sub>R monoclonal primary antibodies (IP<sub>3</sub>R1 KM1112, IP<sub>3</sub>R2 KM1083, IP<sub>3</sub>R3 KM1082) were a kind gift from Prof Katsuhiko Mikoshiba (Sugiyama *et al.*, 1994) and used at a dilution of 1:1000. All primary antibody staining was carried out overnight at 4 °C. Secondary antibody labelling was carried out using either AlexaFluor -488 or -555 conjugated secondary antibodies (Invitrogen), raised against the appropriate species, for 60 minutes at room temperature at a dilution of 1:400. Observations were carried out using a Leica DMIRB inverted microscope modified for confocal laser-scanning microscopy (x63 water objective) and Leica TCSNT software or using a Zeiss LSM 510 (x40 oil objective). For detection of AlexaFluor 488, fluorescence excitation was at 488 nm with emission collected >515 nm. An excitation filter of 543 nm and an emission filter at 600 ± 15 nm were used to detect AlexaFluor 555. In order to quantify the relationship between the red and green signals that were created during double labelling experiments, we carried out a pixel-by-pixel co-localisation analysis. The analysis used produced Pearsons coefficient, which is between -1 (total exclusion of the signals) and +1 (complete co-localisation of the signals).

### *Ca<sup>2+</sup> transient imaging and IP<sub>3</sub> Photorelease*

For whole-cell fluorescence experiments, isolated atrial myocytes were incubated with Fluo-5F (3  $\mu\text{mol/L}$ ) for 10 min then plated to a glass cover slip for imaging. Carbon fiber electrodes were used to field-stimulate  $\text{Ca}^{2+}$  transients at a rate of 1 Hz. All experiments were carried out at  $35 \pm 2^\circ\text{C}$  (fluctuation within a single experiment was  $<0.5^\circ\text{C}$ ) under gravity-fed superfusion of physiological salt solution (PSS, in  $\text{mmol/L}$ ): NaCl 125,  $\text{NaHCO}_3$  25, KCl 5.4,  $\text{NaH}_2\text{PO}_4$  1.2,  $\text{MgCl}_2$  1, glucose 5.5,  $\text{CaCl}_2$  1.8, oxygenated with 95 %  $\text{O}_2$  / 5 %  $\text{CO}_2$ . Solution flow rate was  $3 \text{ mL min}^{-1}$ .

For photorelease experiments, isolated atrial myocytes were incubated for 60 minutes at room temperature with 0.5  $\mu\text{mol/L}$  membrane-permeant caged  $\text{IP}_3$  (caged- $\text{IP}_3/\text{PM}$ ) and 0.025 % Pluronic F127 (Enzo Life Sciences). 3  $\mu\text{mol/L}$  Fluo-5F-AM was added for the last 10 minutes of incubation. DMSO concentrations were 0.5 % during  $\text{IP}_3/\text{PM}$  loading and 0.75 % during  $\text{IP}_3/\text{PM}$ +Fluo-5F. Cells were visualised using a Zeiss Axiovert 200 with attached Nipkow spinning disc confocal unit (CSU-10, Yokogawa Electric Corporation). Excitation light, transmitted through the CSU-10, was provided by a 488 nm diode laser (Vortran Laser Technology Inc.). Emitted light was passed through the CSU-10 and collected by an iXON897 EM-CCD camera (Andor) at 65 frames per second. UV uncaging was carried out using 3x rapid flashes of a Xenon arc lamp (Rapp Optoelectronics), delivered through the objective lens. For inhibitor work, each aliquot of  $\text{IP}_3/\text{PM}$  (3-4 experiments) was first used for a control experiment and inhibitor data were excluded if control cells did not respond. Cells were also excluded if, upon analysis, control (pre-photorelease) data exhibited alternans, missed beats or were otherwise unstable.

### *Murine atrial studies*

Adult male CD1 mice (30-35 g, Charles River UK CD-1® IGS) were housed maintained in a 12 h light-dark cycle with *ad libitum* access to standard diet and sterilised water. Mice were culled by cervical dislocation in accordance with Home Office Guidance on the Animals (Scientific Procedures) Act (1986). The heart was rapidly excised and washed in heparin-containing PSS. The ventricles were dissected away under a microscope and the area adjacent to the sino-atrial node cleared of connective tissue. The spontaneously beating atrial preparation was mounted in a  $37^\circ\text{C}$  organ bath containing oxygenated PSS and connected to a force transducer (MLT0201 series, ADInstruments) in order to visualise contractions. Resting tension was set between 0.2 and 0.3 g, the tension signal was low-pass filtered at 20 Hz and beating rate calculated from the time interval between contractions. After stabilisation

(variation in average rate of a 10s sample of no more than 2 bpm over a 10-minute period), cumulative concentrations of PE were added to the bath (range 0.1 to 30  $\mu\text{mol/L}$ ) in the presence of metoprolol (1  $\mu\text{mol/L}$ , applied 30 min prior to PE) to ensure specificity to  $\alpha$ -adrenergic effects. Preparations were excluded if stabilised beating rate under control conditions (PSS only) was less than 300 bpm or if preparations were not rhythmic.

### *Statistics*

For all single cell data, t-tests or ANOVA were used as appropriate. Experimenters were not blinded to the conditions being analysed. Log(concentration)-response curves, used to estimate EC50s and maximum responses, were calculated using Prism8 software (GraphPad, CA, USA), by fitting an agonist-response curve with a fixed slope to normalised response data. Normalised data was used to compare responses as it was expected some inhibitors used would significantly affect the control beating rate or  $\text{Ca}^{2+}$  transient amplitude. Data are presented as mean  $\pm$  SEM, other than EC50 which are presented as best-fit value with 95 % confidence interval.

## Results

### *Type 2 IP<sub>3</sub> receptors are co-localised with AC8 in cardiac atrial myocytes*

In agreement with published literature (Lipp *et al.*, 2000), type 2 IP<sub>3</sub> receptors were visualised in a punctate pattern at the cell periphery consistent with a position on junctional SR (Figure 1B). Staining for type 1 (Figure 1A) and type 3 IP<sub>3</sub> (Figure 1C) receptors did not demonstrate a distinct sub-cellular pattern.

As has been previously described (Mattick *et al.*, 2007; Collins & Terrar, 2012), immunolocalisation of AC8 indicated a band at or just beneath the sarcolemma. Pixel by pixel analysis revealed substantial co-localisation between AC8 and type-2 IP<sub>3</sub> receptors in isolated guinea pig atrial myocytes, Pearson overlap coefficient  $R = 0.81 \pm 0.02$  (n=14, Figure 1D-F).

AC1 staining was localised to a band which was consistently nearby but predominantly just inside type 2 IP<sub>3</sub> receptors and signals were not substantially overlapping ( $R = 0.36 \pm 0.03$ , n=18, Figure 1G-I).

*The effect of IP<sub>3</sub> on cellular Ca<sup>2+</sup> transients requires functional adenylyl cyclases and PKA*  
IP<sub>3</sub> is not cell permeant and is broken down rapidly within cells. In addition, as activation of  $\alpha$ -ARs (e.g. using PE) may result in signalling via alternative pathways including activation of PKC via diacylglycerol (DAG) (Sanchez-Fernandez *et al.*, 2014), for our experiments we used a cell-permeant, caged version of the compound (IP<sub>3</sub>/PM) to provide cell stimulation specifically via this second messenger from an exogenous source. This IP<sub>3</sub> compound crosses the cell membrane, is de-esterified by constitutive esterase activity and trapped, and finally can be activated by ‘uncaging’ through brief exposure to UV light.

If Ca<sup>2+</sup> release through IP<sub>3</sub> receptors is stimulating cAMP production and PKA activity through AC8, and/or AC1, which is plausible given the immunocytochemistry described in Figure 1, then both functional adenylyl cyclases and PKA would be required for IP<sub>3</sub> to have a complete effect in cardiac atrial cells. Guinea pig atrial myocytes exhibited the classical ‘U-shaped’ activation pattern of cellular Ca<sup>2+</sup> transient (Figure 2A). Photorelease of IP<sub>3</sub> in isolated cardiac atrial myocytes led to a gradual increase in stimulated Ca<sup>2+</sup> transient amplitude (e.g.  $31 \pm 6$  % increase 60 s post photorelease, n=16, Figure 2B+C). This response was completely abolished in the presence of either the adenylyl cyclase inhibitor MDL (3



$\mu\text{mol/L}$ ,  $n=6$ , Figure 2B+D), or PKA inhibitor H89 ( $1 \mu\text{mol/L}$ ,  $n=9$ , Figure 2B+E), e.g. change in  $\text{Ca}^{2+}$  transient at 60 s post photorelease of  $-9 \pm 2 \%$  in the presence of MDL and  $-16 \pm 8 \%$  in the presence of H89. The control  $\text{IP}_3$  response was significantly greater than that of MDL or H89 at all measured timepoints after  $\text{IP}_3$  photorelease ( $P < 0.05$ , ANOVA), whilst the responses seen in the presence of MDL or H89 were not significantly different from one another throughout all timepoints ( $P > 0.05$ , ANOVA).

PE responses in cat atrial myocytes have been reported to be dependent on nitric oxide modulated soluble guanylyl cyclase activity (Wang *et al.*, 2005). We therefore carried out  $\text{IP}_3$  photorelease in the presence of either  $10 \mu\text{M}$  ODQ to inhibit soluble guanylyl cyclase, or  $100 \mu\text{M}$  L-NAME to inhibit nitric oxide synthase. There was no change in the response to  $\text{IP}_3$  photorelease in the presence of ODQ ( $P > 0.05$ , ANOVA,  $n=10$ , Figure 2B+F) or L-NAME ( $P > 0.05$ , ANOVA,  $n=4$ , Figure 2B+G); under both conditions  $\text{Ca}^{2+}$  transient amplitude increased significantly over time, beginning rapidly after photorelease of  $\text{IP}_3$ , and was not significantly different to control at any timepoint.

#### *The positive chronotropic effect of PE on the sino-atrial node also requires functional adenylyl cyclases*

It has been established that endogenous generation, or exogenous administration, of  $\text{IP}_3$  in the sino-atrial node leads to an increase in spontaneous beating rate, accompanied by an increase in  $\text{Ca}^{2+}$  transient amplitude (Ju *et al.*, 2011), whilst cAMP from  $\text{Ca}^{2+}$ -stimulated adenylyl cyclases has been shown to modulate the funny current in these cells (Mattick *et al.*, 2007). Spontaneously beating atrial tissue preparations can also provide a measure of sino-atrial node activity through measurement of beating rate. Log(concentration)-response curves to PE in the concentration range  $0.1 - 30 \mu\text{mol/L}$  were carried out on spontaneously beating isolated murine right atria in the presence of  $1 \mu\text{mol/L}$  metoprolol to ensure no confounding action of  $\beta$ -adrenergic receptors. Under these conditions, the positive chronotropic response to PE fit a standard agonist dose-response curve with an  $\text{EC}_{50}$  of  $1.12 \mu\text{mol/L}$  (95 % CI 0.56 to 2.22) and a maximum rate increase of  $15.1 \pm 0.2 \%$  ( $n=10$ , Figure 3A).

Addition of a low concentration of 2-Aminoethyl diphenylborinate (2-APB) ( $2.5 \mu\text{mol/L}$ ), which is low enough to inhibit  $\text{IP}_3$ -dependent effects in cardiomyocytes without altering cellular  $\text{Ca}^{2+}$  transient amplitude or SERCA function (Maruyama *et al.*, 1997; Bootman *et al.*, 2002; Peppiatt *et al.*, 2003; Ju *et al.*, 2011), had no significant effect on right atrial beating

rate over the course of at least 30 min ( $P>0.05$ , Paired t-test,  $n=7$ , Figure 3B). In the presence of 2-APB, the maximum rate increase observed on addition of PE was significantly reduced, to  $4.7 \pm 0.2$  % ( $n=7$ , Figure 3A), without significant effect on EC50 ( $1.69 \mu\text{mol/L}$ , 95 % CI 0.99 to 2.89).

Addition of  $1 \mu\text{mol/L}$  MDL to inhibit adenylyl cyclase activity led to a  $34.5 \pm 6.4$  % reduction in beating rate in the absence of further intervention (Figure 3B,  $P<0.05$ , Paired t-test,  $n=5$ ). Under these conditions, bath application of cumulative doses of PE no longer led to an increase in beating rate (maximum rate change  $0.7 \pm 0.2$  %,  $n=5$ , Figure 3A). In agreement with the  $\text{IP}_3$  photorelease data detailed above, neither L-NAME ( $100 \mu\text{mol/L}$ ,  $n=6$ ), nor ODQ ( $30 \mu\text{mol/L}$ ,  $n=5$ ) had a significant effect upon spontaneous beating rate under control conditions (Figure 3B), the maximum response to PE or the EC50 of the response to PE (Figure 3A).

## Discussion

This study represents the first measurements that link direct cellular stimulation with IP<sub>3</sub> in atrial myocytes to downstream actions via the generation of cAMP and activation of PKA. Our work is consistent with the hypothesis that interaction of IP<sub>3</sub>-mediated Ca<sup>2+</sup> release with the cAMP system is essential for the positive inotropic and chronotropic effects of this compound in the cardiac atria and sino-atrial node, and that this is physiologically important in the response of these tissues to  $\alpha$ -adrenoceptor stimulation. Structural studies using immunostaining methods, which initially led us to investigate this intriguing possibility within our preparations, highlight the Ca<sup>2+</sup>-stimulated isoform AC8 as a probable candidate for this interaction, although involvement of AC1 cannot be excluded.

Ten mammalian adenylyl cyclase isoforms have been discovered, nine membrane bound and one soluble form. Of these, three are Ca<sup>2+</sup>-sensitive; AC1 is CaM-dependently Ca<sup>2+</sup> stimulated (Tang *et al.*, 1991) with an EC<sub>50</sub> for Ca<sup>2+</sup> of 75 nmol/L (Wu *et al.*, 1993), AC8 is CaM-dependently stimulated (Cali *et al.*, 1994; Simpson *et al.*, 2006) with a K<sub>a</sub> for Ca<sup>2+</sup> activation of ~0.5  $\mu$ mol/L (Smith *et al.*, 2002) and AC5 is CaM-independently inhibited (Colvin *et al.*, 1991; Guillou *et al.*, 1999). The majority of previous studies on AC1 and AC8 pertain to roles in the brain, where these enzymes have been implicated in a range of processes including spatial memory formation (Wu *et al.*, 1995; Wang *et al.*, 2004; Zhang *et al.*, 2008), neurodevelopment (Susick *et al.*, 2014), responses to inflammatory pain (Li *et al.*, 2006; Zachariou *et al.*, 2008) and opioid dependence (Li *et al.*, 2006; Zachariou *et al.*, 2008). AC1 may also have a role in podocytes of the glomerulus of the kidney (Xiao *et al.*, 2011). Our immunocytochemistry data demonstrates that AC8 is found in close proximity to IP<sub>3</sub>Rs in cardiac atrial myocytes whereas AC1 is found in a band just inside these receptors. AC8, therefore, is ideally positioned to transduce local changes in Ca<sup>2+</sup> into the cAMP-dependent and PKA-dependent effects detailed in this paper; namely the modulation of cellular Ca<sup>2+</sup> transients in response to IP<sub>3</sub>. Given the known position of IP<sub>3</sub>Rs on the junctional SR (Lipp *et al.*, 2000; Mackenzie *et al.*, 2002), it is not possible for our staining to distinguish whether AC8 is located on the SR itself or on the surface membrane, situated less than 20 nm away (Schulson *et al.*, 2011; Scriven *et al.*, 2013). Sucrose-based fractionation of isolated SAN myocytes has indicated that AC1 and AC8 activity is most associated with fractions also containing caveolin-3 (Younes *et al.*, 2008). In other cell types AC8 has been localised to caveolae (Crossthwaite *et al.*, 2005), and disruption of lipid rafts has been seen to abolish the stimulation of this cyclase by Ca<sup>2+</sup> (Smith *et al.*, 2002). Taken together, this evidence is

consistent with a surface membrane distribution of this enzyme. Although it seems most likely that  $\text{Ca}^{2+}$  released via  $\text{IP}_3\text{Rs}$  activates colocalised AC8, the possibility that this  $\text{Ca}^{2+}$  could also diffuse to activate nearby AC1 cannot be excluded.

The schematic shown in Figure 4 provides details of the potential mechanisms that may result in increased  $\text{Ca}^{2+}$  transient amplitude following activation of the  $\text{IP}_3$  signalling pathway. Increased activation of PKA via  $\text{Ca}^{2+}$  activation of AC8 (or AC1) may lead to multiple downstream actions that have the potential to increase the risk of arrhythmia. The precise contributions of these actions require further investigation but may include PKA mediated phosphorylation of ryanodine receptors (RyR) (Takasago *et al.*, 1989), L-type  $\text{Ca}^{2+}$  channels (LTCC) (McDonald *et al.*, 1994), phospholamban (PLB) (Lindemann *et al.*, 1983) and the  $\text{Na}^+/\text{Ca}^+$  exchanger (NCX) (Perchenet *et al.*, 2000, for review see Zhang & Hancox, 2009). Figure 4 demonstrates that the increased activation of one or more of these pathways may contribute to increased levels of cytosolic and SR  $\text{Ca}^{2+}$ , e.g. through the generation of delayed after-depolarisations (Sipido *et al.* 2006). It is possible that the activity of PKA augments regulation by PKC, which has also been well documented at these same target sites and is similarly activated via stimulation of  $\text{G}_q$  coupled receptors (Kramer *et al.* 1991; Woo & Lee, 1999; Yang *et al.* 1999; He *et al.* 2010; Zhang *et al.*, 2001). The use of caged- $\text{IP}_3$  in this study however rather than stimulation of  $\text{G}_q$  coupled receptors (Figure 3) demonstrates that the effects on cellular  $\text{Ca}^{2+}$  observed in the present study can occur via the effects of  $\text{IP}_3$  signalling specifically and are independent of activation of DAG.

Under the conditions of our study, inhibition of ACs or PKA significantly reduced baseline stimulated  $\text{Ca}^{2+}$  transient amplitude in atrial myocytes and beating rate in right atrial preparations. This is consistent with published data from our group (Mattick *et al.*, 2007; Collins & Terrar, 2012) and others (Vinogradova *et al.*, 2008; Vinogradova *et al.*, 2018). Indeed, it has previously been shown that heart rate in AC8 over-expressing mice is significantly higher than in their wild-type counterparts (Georget *et al.*, 2002). The sino-atrial node has a constitutive level of cAMP which is significantly greater than that of the ventricle in the absence of adrenergic stimulation (Vinogradova *et al.*, 2006). How much of this activity is attributable specifically to  $\text{Ca}^{2+}$ -stimulated ACs is not discernable from our experiments as selective inhibitors are not currently available for all ACs. The diastolic cell  $\text{Ca}^{2+}$  concentration in SAN myocytes, ~225 nmol/L (Sanders *et al.*, 2006), is considerably higher than that in ventricular cells. Given that AC1 and AC8 proteins have not been shown

to be expressed in ventricular tissue (Mattick *et al.*, 2007), it seems likely that cAMP production by  $\text{Ca}^{2+}$ -stimulated ACs could contribute to the differences between resting SA nodal and ventricular cAMP concentration previously reported (Vinogradova *et al.*, 2006). Indeed, cAMP synthesis activity is high in SAN myocyte lysates in 1  $\mu\text{mol/L}$   $\text{Ca}^{2+}$  but almost abolished in  $\text{Ca}^{2+}$ -free solution (Younes *et al.*, 2008), suggesting  $\text{Ca}^{2+}$ -stimulated cAMP production may be the dominant mechanism in these cells at rest. Our data indicate that high constitutive cAMP production in the atria and sino-atrial node cannot be attributed to background  $\text{IP}_3\text{R}$  activity under the conditions of our experiments, as 2-APB alone did not have a significant effect on cellular  $\text{Ca}^{2+}$  transient amplitude or tissue beating rate.

In atrial myocytes isolated from cat, the effects of PE to enhance  $\text{I}_{\text{CaL}}$  have been reported to occur through inhibition of phosphodiesterase downstream of PI-3K-mediated eNOS activation (Wang *et al.*, 2005). It was concluded that the primary role of  $\text{IP}_3$ -mediated  $\text{Ca}^{2+}$  release in this process was to stimulate eNOS. Whilst we agree that cAMP and PKA are central to the response of atrial myocytes and the sino-atrial node to PE, and  $\text{IP}_3$ , we did not find evidence that nitric oxide or soluble guanylyl cyclase activity was required for enhancement of atrial whole-cell  $\text{Ca}^{2+}$  transients in the guinea pig or SA-nodal beating rate in the mouse under the conditions of our experiments.

It has previously been hypothesised that  $\text{Ca}^{2+}$  release through  $\text{IP}_3\text{Rs}$  acts to enhance atrial myocyte  $\text{Ca}^{2+}$  transients by increasing the local  $\text{Ca}^{2+}$  concentration around RyRs and therefore enhancing RyR response to the opening of LTCC (Lipp *et al.*, 2000; Liang *et al.*, 2009). Although this is plausible, and has been observed in an  $\text{IP}_3\text{R}$  over-expression model (Wullschlegel *et al.*, 2017), our data investigating the direct effect of  $\text{IP}_3$  photorelease in the presence of downstream inhibitors, supported by that of Wang *et al.* (2005) using indirect stimulation of the  $\text{IP}_3$  pathway, is consistent with the notion that the functional, physiological consequences of  $\text{IP}_3\text{R}$  opening in cardiac atrial myocytes may result predominantly from modulation of other signalling pathways as opposed to direct effects on RyR responsiveness.

Even in healthy atrial myocytes, stimulation of  $\text{IP}_3\text{Rs}$  can generate arrhythmogenic  $\text{Ca}^{2+}$  waves (Lipp *et al.*, 2000; Mackenzie *et al.*, 2002). In fact, stimulation of rat atrial myocytes demonstrated that  $\text{IP}_3$  is more arrhythmogenic than levels of either digoxin or endothelin producing a similar change in  $\text{Ca}^{2+}$  transient amplitude, and more arrhythmogenic than isoprenaline despite a greater  $\text{Ca}^{2+}$  transient response to this sympathomimetic (Mackenzie *et*

*al.*, 2002). IP<sub>3</sub>R expression is significantly increased in cells from AF patients (Yamda *et al.*, 2001), and animal models of AF (Zhao *et al.*, 2007). Further, IP<sub>3</sub>R expression is increased in atrial myocytes from a heart failure model (Hohendanner *et al.*, 2015), a condition strongly associated with development of AF. This evidence highlights the importance of understanding the cellular mechanisms of the IP<sub>3</sub> pathway in healthy and diseased cardiomyocytes.

The present paper provides novel information regarding the signalling pathways responsible for physiological responses to IP<sub>3</sub>, namely a crucial requirement for cAMP and PKA. In particular, we have focused on the position of Ca<sup>2+</sup>-stimulated ACs as an effector of this interaction. These novel data are not only interesting in that they provide an added level of complexity to Ca<sup>2+</sup> modulation in the atria and sino-atrial node, but that they also raise questions about the mechanisms and role of this signalling in common pathology.

## **Acknowledgements**

### **Sources of Funding**

RABB is funded by a Sir Henry Dale Wellcome Trust and Royal Society Fellowship (109371/Z/15/Z). This project was supported by a British Heart Foundation Project Grant (PG/18/4/33521). RAC is a post-doctoral scientist funded by the Wellcome Trust and Royal Society (109371/Z/15/Z). TPC was funded through a British Heart Foundation DPhil studentship (FS/05/121) in the DAT lab. SJB is a post-doctoral scientist funded by the British Heart Foundation (PG/18/4/33521). TA received funding from the Returners Carers Fund (PI RABB), Medical Science Division, University of Oxford, the Nuffield Benefaction for Medicine and the Wellcome Institutional Strategic Support Fund (ISSF), University of Oxford.

### **Disclosures**

The authors do not declare any conflicts of interest

## References

- Berridge MJ & Irvine RF. (1984). Inositol trisphosphate, a novel second messenger in cellular signal transduction. *Nature* **312**, 315-321.
- Boink GJ, Nearing BD, Shlapakova IN, Duan L, Kryukova Y, Bobkov Y, Tan HL, Cohen IS, Danilo P, Jr., Robinson RB, Verrier RL & Rosen MR. (2012).  $\text{Ca}^{2+}$ -stimulated adenylyl cyclase AC1 generates efficient biological pacing as single gene therapy and in combination with HCN2. *Circulation* **126**, 528-536.
- Bootman MD, Collins TJ, Mackenzie L, Roderick HL, Berridge MJ & Peppiatt CM. (2002). 2-aminoethoxydiphenyl borate (2-APB) is a reliable blocker of store-operated  $\text{Ca}^{2+}$  entry but an inconsistent inhibitor of  $\text{InsP}_3$ -induced  $\text{Ca}^{2+}$  release. *FASEB journal : official publication of the Federation of American Societies for Experimental Biology* **16**, 1145-1150.
- Cali JJ, Zwaagstra JC, Mons N, Cooper DM & Krupinski J. (1994). Type VIII adenylyl cyclase. A  $\text{Ca}^{2+}$ /calmodulin-stimulated enzyme expressed in discrete regions of rat brain. *The Journal of biological chemistry* **269**, 12190-12195.
- Collins TP & Terrar DA. (2012).  $\text{Ca}^{2+}$ -stimulated adenylyl cyclases regulate the L-type  $\text{Ca}^{2+}$  current in guinea-pig atrial myocytes. *The Journal of physiology* **590**, 1881-1893.
- Colvin RA, Oibo JA & Allen RA. (1991). Calcium inhibition of cardiac adenylyl cyclase. Evidence for two distinct sites of inhibition. *Cell calcium* **12**, 19-27.
- Crossthwaite AJ, Seebacher T, Masada N, Ciruela A, Dufraux K, Schultz JE & Cooper DM. (2005). The cytosolic domains of  $\text{Ca}^{2+}$ -sensitive adenylyl cyclases dictate their targeting to plasma membrane lipid rafts. *The Journal of biological chemistry* **280**, 6380-6391.
- DiFrancesco D & Tortora P. (1991). Direct activation of cardiac pacemaker channels by intracellular cyclic AMP. *Nature* **351**, 145-147.



Gassanov N, Brandt MC, Michels G, Lindner M, Er F & Hoppe UC. (2006). Angiotensin II-induced changes of calcium sparks and ionic currents in human atrial myocytes: potential role for early remodeling in atrial fibrillation. *Cell calcium* **39**, 175-186.

Georget M, Mateo P, Vandecasteele G, Jurevicius J, Lipskaia L, Defer N, Hanoune J, Hoerter J & Fischmeister R. (2002). Augmentation of cardiac contractility with no change in L-type  $\text{Ca}^{2+}$  current in transgenic mice with a cardiac-directed expression of the human adenylyl cyclase type 8 (AC8). *FASEB journal : official publication of the Federation of American Societies for Experimental Biology* **16**, 1636-1638.

Grundy D. (2015). Principles and standards for reporting animal experiments in The Journal of Physiology and Experimental Physiology. *The Journal of physiology* **593**, 2547-2549.

Guellich A, Mehel H & Fischmeister R. (2014). Cyclic AMP synthesis and hydrolysis in the normal and failing heart. *Pflugers Archive: European journal of physiology* **466**, 1163-1175.

Guillou JL, Nakata H & Cooper DM. (1999). Inhibition by calcium of mammalian adenylyl cyclases. *The Journal of biological chemistry* **274**, 35539-35545.

He JQ, Pi Y, Walker JW & Kamp TJ. (2000) Endothelin-1 and photoreleased diacylglycerol increase L-type  $\text{Ca}^{2+}$  current by activation of protein kinase C in rat ventricular myocytes. *The Journal of physiology* **524**, 807-820.

Hohendanner F, Walther S, Maxwell JT, Kettlewell S, Awad S, Smith GL, Lonchyna VA & Blatter LA. (2015). Inositol-1,4,5-trisphosphate induced  $\text{Ca}^{2+}$  release and excitation-contraction coupling in atrial myocytes from normal and failing hearts. *The Journal of physiology* **593**, 1459-1477.

Ju YK, Liu J, Lee BH, Lai D, Woodcock EA, Lei M, Cannell MB & Allen DG. (2011). Distribution and functional role of inositol 1,4,5-trisphosphate receptors in mouse sinoatrial node. *Circulation research* **109**, 848-857.

Kapoor N, Tran A, Kang J, Zhang R, Philipson KD & Goldhaber JL. (2015). Regulation of calcium clock-mediated pacemaking by inositol-1,4,5-trisphosphate receptors in mouse sinoatrial nodal cells. *The Journal of physiology* **593**, 2649-2663.

Kramer BK, Smith TW & Kelly RA (1991) Endothelin and increased contractility in adult rat ventricular myocytes. Role of intracellular alkalosis induced by activation of the protein kinase C-dependent Na<sup>+</sup>-H<sup>+</sup> exchanger. *Circulation research* **68**, 269-279.

Li S, Lee ML, Bruchas MR, Chan GC, Storm DR & Chavkin C. (2006). Calmodulin-stimulated adenylyl cyclase gene deletion affects morphine responses. *Mol Pharmacol* **70**, 1742-1749.

Liang X, Xie H, Zhu PH, Hu J, Zhao Q, Wang CS & Yang C. (2009). Enhanced activity of inositol-1,4,5-trisphosphate receptors in atrial myocytes of atrial fibrillation patients. *Cardiology* **114**, 180-191.

Lipp P, Laine M, Tovey SC, Burrell KM, Berridge MJ, Li W & Bootman MD. (2000). Functional InsP<sub>3</sub> receptors that may modulate excitation-contraction coupling in the heart. *Current biology : CB* **10**, 939-942.

Mackenzie L, Bootman MD, Laine M, Berridge MJ, Thuring J, Holmes A, Li WH & Lipp P. (2002). The role of inositol 1,4,5-trisphosphate receptors in Ca<sup>2+</sup> signalling and the generation of arrhythmias in rat atrial myocytes. *The Journal of physiology* **541**, 395-409.

Maruyama T, Kanaji T, Nakade S, Kanno T & Mikoshiba K. (1997). 2APB, 2-aminoethoxydiphenyl borate, a membrane-penetrable modulator of Ins(1,4,5)P<sub>3</sub>-induced Ca<sup>2+</sup> release. *J Biochem* **122**, 498-505.

Mattick P, Parrington J, Odia E, Simpson A, Collins T & Terrar D. (2007). Ca<sup>2+</sup>-stimulated adenylyl cyclase isoform AC1 is preferentially expressed in guinea-pig sino-atrial node cells and modulates the I(f) pacemaker current. *The Journal of physiology* **582**, 1195-1203.

Moravec CS, Reynolds EE, Stewart RW & Bond M. (1989). Endothelin is a positive inotropic agent in human and rat heart in vitro. *Biochemical and biophysical research communications* **159**, 14-18.

Nakashima H, Kumagai K, Urata H, Gondo N, Ideishi M & Arakawa K. (2000). Angiotensin II antagonist prevents electrical remodeling in atrial fibrillation. *Circulation* **101**, 2612-2617.

Nosek TM, Williams MF, Zeigler ST & Godt RE. (1986). Inositol trisphosphate enhances calcium release in skinned cardiac and skeletal muscle. *Am J Physiol* **250**, C807-811.

Peppiatt CM, Collins TJ, Mackenzie L, Conway SJ, Holmes AB, Bootman MD, Berridge MJ, Seo JT & Roderick HL. (2003). 2-Aminoethoxydiphenyl borate (2-APB) antagonises inositol 1,4,5-trisphosphate-induced calcium release, inhibits calcium pumps and has a use-dependent and slowly reversible action on store-operated calcium entry channels. *Cell calcium* **34**, 97-108.

Remus TP, Zima AV, Bossuyt J, Bare DJ, Martin JL, Blatter LA, Bers DM & Mignery GA. (2006). Biosensors to measure inositol 1,4,5-trisphosphate concentration in living cells with spatiotemporal resolution. *The Journal of biological chemistry* **281**, 608-616.

Rhee SG. (2001). Regulation of phosphoinositide-specific phospholipase C. *Annual review of biochemistry* **70**, 281-312.

Rigg L, Mattick PA, Heath BM & Terrar DA. (2003). Modulation of the hyperpolarization-activated current (I<sub>f</sub>) by calcium and calmodulin in the guinea-pig sino-atrial node. *Cardiovascular research* **57**, 497-504.

Sanchez-Fernandez G, Cabezudo S, Garcia-Hoz C, Beninca C, Aragay AM, Mayor F, Jr. & Ribas C. (2014). Gαq signalling: the new and the old. *Cellular signalling* **26**, 833-848.

Sanders L, Rakovic S, Lowe M, Mattick PA & Terrar DA. (2006). Fundamental importance of Na<sup>+</sup>-Ca<sup>2+</sup> exchange for the pacemaking mechanism in guinea-pig sino-atrial node. *The Journal of physiology* **571**, 639-649.

Schulson MN, Scriven DR, Fletcher P & Moore ED. (2011). Couplons in rat atria form distinct subgroups defined by their molecular partners. *Journal of cell science* **124**, 1167-1174.

Scriven DR, Asghari P & Moore ED. (2013). Microarchitecture of the dyad. *Cardiovascular research* **98**, 169-176.

Simpson RE, Ciruela A & Cooper DM. (2006). The role of calmodulin recruitment in  $\text{Ca}^{2+}$  stimulation of adenylyl cyclase type 8. *The Journal of biological chemistry* **281**, 17379-17389.

Sipido KR, Varro A & Eisner D. (2006). Sodium calcium exchange as a target for antiarrhythmic therapy. *Handb. Exp. Pharmacol* pp159-199.

Smith KE, Gu C, Fagan KA, Hu B & Cooper DM. (2002). Residence of adenylyl cyclase type 8 in caveolae is necessary but not sufficient for regulation by capacitative  $\text{Ca}^{2+}$  entry. *The Journal of biological chemistry* **277**, 6025-6031.

Sugiyama T, Furuya A, Monkawa T, Yamamoto-Hino M, Satoh S, Ohmori K, Miyawaki A, Hanai N, Mikoshiba K & Hasegawa M. (1994). Monoclonal antibodies distinctively recognizing the subtypes of inositol 1,4,5-trisphosphate receptor: application to the studies on inflammatory cells. *FEBS letters* **354**, 149-154.

Susick LL, Lowing JL, Provenzano AM, Hildebrandt CC & Conti AC. (2014). Postnatal ethanol exposure simplifies the dendritic morphology of medium spiny neurons independently of adenylyl cyclase 1 and 8 activity in mice. *Alcohol Clin Exp Res* **38**, 1339-1346.

Tang WJ, Krupinski J & Gilman AG. (1991). Expression and characterization of calmodulin-activated (type I) adenylylcyclase. *The Journal of biological chemistry* **266**, 8595-8603.

Vinogradova TM, Lyashkov AE, Zhu W, Ruknudin AM, Sirenko S, Yang D, Deo S, Barlow M, Johnson S, Caffrey JL, Zhou YY, Xiao RP, Cheng H, Stern MD, Maltsev VA & Lakatta EG. (2006). High basal protein kinase A-dependent phosphorylation drives rhythmic internal

Ca<sup>2+</sup> store oscillations and spontaneous beating of cardiac pacemaker cells. *Circulation research* **98**, 505-514.

Vinogradova TM, Sirenko S, Lukyanenko YO, Yang D, Tarasov KV, Lyashkov AE, Varghese NJ, Li Y, Chakir K, Ziman B & Lakatta EG. (2018). Basal spontaneous firing of rabbit sinoatrial node cells is regulated by dual activation of PDEs (phosphodiesterases) 3 and 4. *Circulation Arrhythmia and electrophysiology* **11**, e005896.

Vinogradova TM, Sirenko S, Lyashkov AE, Younes A, Li Y, Zhu W, Yang D, Ruknudin AM, Spurgeon H & Lakatta EG. (2008). Constitutive phosphodiesterase activity restricts spontaneous beating rate of cardiac pacemaker cells by suppressing local Ca<sup>2+</sup> releases. *Circulation research* **102**, 761-769.

Wang H, Ferguson GD, Pineda VV, Cundiff PE & Storm DR. (2004). Overexpression of type-1 adenylyl cyclase in mouse forebrain enhances recognition memory and LTP. *Nature neuroscience* **7**, 635-642.

Wang YG, Dedkova EN, Ji X, Blatter LA & Lipsius SL. (2005). Phenylephrine acts via IP<sub>3</sub>-dependent intracellular NO release to stimulate L-type Ca<sup>2+</sup> current in cat atrial myocytes. *The Journal of physiology* **567**, 143-157.

Woo SH & Lee CO (1999) Effects of endothelin-1 on Ca<sup>2+</sup> signalling in guinea-pig ventricular myocytes: role of protein kinase C. *J Mol Cell Cardiol* 1999; **31**, 631-643.

Wu Z, Wong ST & Storms DR. (1993). Modification of the calcium and calmodulin sensitivity of the type I adenylyl cyclase by mutagenesis of its calmodulin binding domain. *The Journal of biological chemistry* **268**, 23766-23768.

Wu ZL, Thomas SA, Villacres EC, Xia Z, Simmons ML, Chavkin C, Palmiter RD & Storm DR. (1995). Altered behavior and long-term potentiation in type I adenylyl cyclase mutant mice. *Proceedings of the National Academy of Sciences of the United States of America* **92**, 220-224.

Wullschleger M, Blanch J & Egger M. (2017). Functional local crosstalk of inositol 1,4,5-trisphosphate receptor- and ryanodine receptor-dependent  $\text{Ca}^{2+}$  release in atrial cardiomyocytes. *Cardiovascular research* **113**, 542-552.

Xiao Z, He L, Takemoto M, Jalanko H, Chan GC, Storm DR, Betsholtz C, Tryggvason K & Patrakka J. (2011). Glomerular podocytes express type 1 adenylate cyclase: inactivation results in susceptibility to proteinuria. *Nephron Exp Nephrol* **118**, e39-48.

Yamada J, Ohkusa T, Nao T, Ueyama T, Yano M, Kobayashi S, Hamano K, Esato K & Matsuzaki M. (2001). Up-regulation of inositol 1,4,5 trisphosphate receptor expression in atrial tissue in patients with chronic atrial fibrillation. *Journal of the American College of Cardiology* **37**, 1111-1119.

Yang HT, Sakurai K, Sugawara H, Watanabe T, Norota I & Endoh M (1999). Role of  $\text{Na}^+/\text{Ca}^{2+}$  exchange in endothelin-1 induced increases in  $\text{Ca}^{2+}$  transient and contractility in rabbit ventricular myocytes: pharmacological analysis with KB-R7943. *British Journal of Pharmacology* **126**, 1785-1795.

Younes A, Lyashkov AE, Graham D, Sheydina A, Volkova MV, Mitsak M, Vinogradova TM, Lukyanenko YO, Li Y, Ruknudin AM, Boheler KR, van Eyk J & Lakatta EG. (2008).  $\text{Ca}^{2+}$ -stimulated basal adenylyl cyclase activity localization in membrane lipid microdomains of cardiac sinoatrial nodal pacemaker cells. *The Journal of biological chemistry* **283**, 14461-14468.

Zachariou V, Liu R, LaPlant Q, Xiao G, Renthal W, Chan GC, Storm DR, Aghajanian G & Nestler EJ. (2008). Distinct roles of adenylyl cyclases 1 and 8 in opiate dependence: behavioral, electrophysiological, and molecular studies. *Biol Psychiatry* **63**, 1013-1021.

Zhang YH, James AF & Hancox JC (2001) Regulation by endothelin-1 of  $\text{Na}^+/\text{Ca}^{2+}$  exchange current ( $I_{\text{NaCa}}$ ) from guinea-pig isolated ventricular myocytes. *Cell calcium* **30**, 351-360

Zhang YH & Hancox JC. (2009) Regulation of cardiac  $\text{Na}^+/\text{Ca}^{2+}$  exchanger activity by protein kinase phosphorylation -- still a paradox? *Cell calcium* **45**, 1-10.

Zhang M, Moon C, Chan GC, Yang L, Zheng F, Conti AC, Muglia L, Muglia LJ, Storm DR & Wang H. (2008).  $\text{Ca}^{2+}$ -stimulated type 8 adenylyl cyclase is required for rapid acquisition of novel spatial information and for working/episodic-like memory. *The Journal of neuroscience : the official journal of the Society for Neuroscience* **28**, 4736-4744.

Zhao ZH, Zhang HC, Xu Y, Zhang P, Li XB, Liu YS & Guo JH. (2007). Inositol-1,4,5-trisphosphate and ryanodine-dependent  $\text{Ca}^{2+}$  signaling in a chronic dog model of atrial fibrillation. *Cardiology* **107**, 269-276.

## Tables

None



## Figure Legends

### Figure 1

#### **IP<sub>3</sub> Receptor Type 2 Co-localises with Adenylyl Cyclase 8 in guinea pig atrial myocytes.**

**A - C.** Representative examples of fixed, isolated guinea pig atrial myocytes labelled for **A.** IP<sub>3</sub>R1, **B.** IP<sub>3</sub>R2 and **C.** IP<sub>3</sub>R3. **D.** Representative example of a fixed, isolated guinea pig atrial myocyte co-immunolabelled for IP<sub>3</sub>R2 (red) and AC8 (green). **E.** Digital zoom of the area indicated on image D. **F.** Intensity plot to show staining intensity along the line shown in E. Full dataset Pearson overlap coefficient  $R = 0.81 \pm 0.02$  (n=14). **G.** Representative example of a fixed, isolated guinea pig atrial myocyte co-immunolabelled for IP<sub>3</sub>R2 (red) and AC1 (green). **H.** Digital zoom of the area indicated on image G. **I.** Intensity plot to show staining intensity along the line shown in H. Full dataset Pearson overlap coefficient  $R = 0.36 \pm 0.03$  (n=18).

### Figure 2

#### **The direct actions of IP<sub>3</sub> in guinea pig atrial myocytes require adenylyl cyclases and PKA**

**A.** Montage to show the progress of a control Ca<sup>2+</sup> transient in PSS illustrating the classical U-shaped activation pattern. Numbers indicate time in ms from the start of the recording. **B.** Summary data to show cellular responses to IP<sub>3</sub> photorelease (0.5 μmol/L caged-IP<sub>3</sub>/PM loaded for 1 h) in isolated guinea pig atrial myocytes under control conditions (n=16) and in the presence of 1 μmol/L H89 (n=9), 3 μmol/L MDL (n=6), 100 μmol/L L-NAME (n=4) and 10 μmol/L ODQ (n=10). \* denotes significant difference in comparison to IP<sub>3</sub> photorelease alone ( $P < 0.05$ , ANOVA with Dunnet's post-hoc test). **C-G.** Representative Ca<sup>2+</sup> transient under control conditions and 120 s post photorelease of IP<sub>3</sub> in: **C.** PSS, **D.** MDL, **E.** H89, **F.** ODQ and **G.** L-NAME.

### Figure 3

#### **The positive chronotropic effect of PE requires adenylyl cyclases**

**A.** Dose-response curves to show the change in beating rate on cumulative addition of PE to spontaneously beating murine right atrial preparations under control conditions (n=10) and in the presence of either 2-APB (2.5 μmol/L, n=7), MDL (1 μmol/L, n=5), L-NAME (100 μmol/L, n=6) or ODQ (30 μmol/L, n=5). \* denotes significant reduction in maximum response of the fitted curve by F-test. **B.** Comparison of beating rate change in spontaneously

beating murine atrial preparations from control (stable beating in physiological salt solution) on addition of the inhibitors used in A, prior to stimulation by PE. \* denotes significant reduction from control by Paired t-test with Bonferroni correction.

#### Figure 4

**Proposed mechanisms for regulation of intracellular calcium via IP<sub>3</sub> signalling.** Scheme indicates potential mechanisms by which activation of  $\alpha 1$ -AR by PE may lead to increased cytoplasmic calcium transients (indicated by  $[Ca^{2+}]_i$ ) and SR-calcium load ( $[Ca^{2+}]_{SR}$ ) in atrial myocytes based on published observations in addition to our present results. Activation of  $\alpha 1$ -AR leads to elevated IP<sub>3</sub> resulting from cleavage of PIP<sub>2</sub> to DAG and IP<sub>3</sub> by PLC. IP<sub>3</sub> activation of IP<sub>3</sub>R<sub>2</sub> results in release of  $Ca^{2+}$  from the SR, which subsequently leads to activation of  $Ca^{2+}$ -sensitive adenylyl cyclase (AC8 or AC1) and activation of PKA by cAMP. Previously published observations support the regulation of multiple targets via PKA phosphorylation that may contribute to increases in  $[Ca^{2+}]_i$  and  $[Ca^{2+}]_{SR}$ , including L-type  $Ca^{2+}$  Channels (LTCC) (McDonald et al. 1994), RyR (Takasago et al. 1989), PLB (Lindemann et al. 1983) and NCX (Perchenet et al. 2000). Our current observations suggest that IP<sub>3</sub> signalling via one or more of these pathways may contribute to increases in  $[Ca^{2+}]_i$  and  $[Ca^{2+}]_{SR}$ . In the proposed scheme AC8 is placed in the sarcolemma, but it remains to be established whether there is an additional location in the junctional SR and whether nearby AC1 may also be activated by IP<sub>3</sub>-mediated  $Ca^{2+}$  release. Image created with BioRender.

**Figure 1**

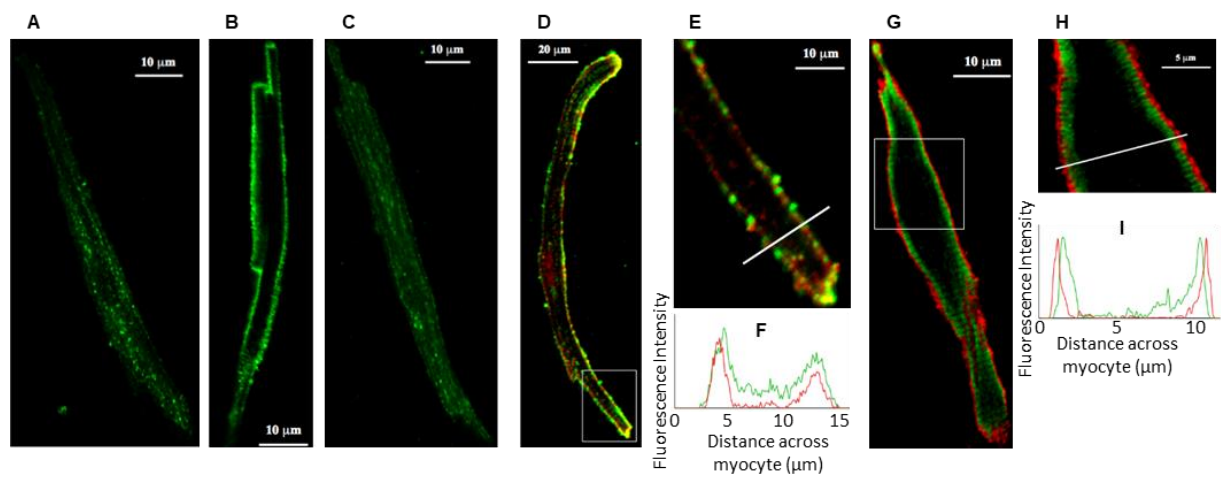

**Figure 2**

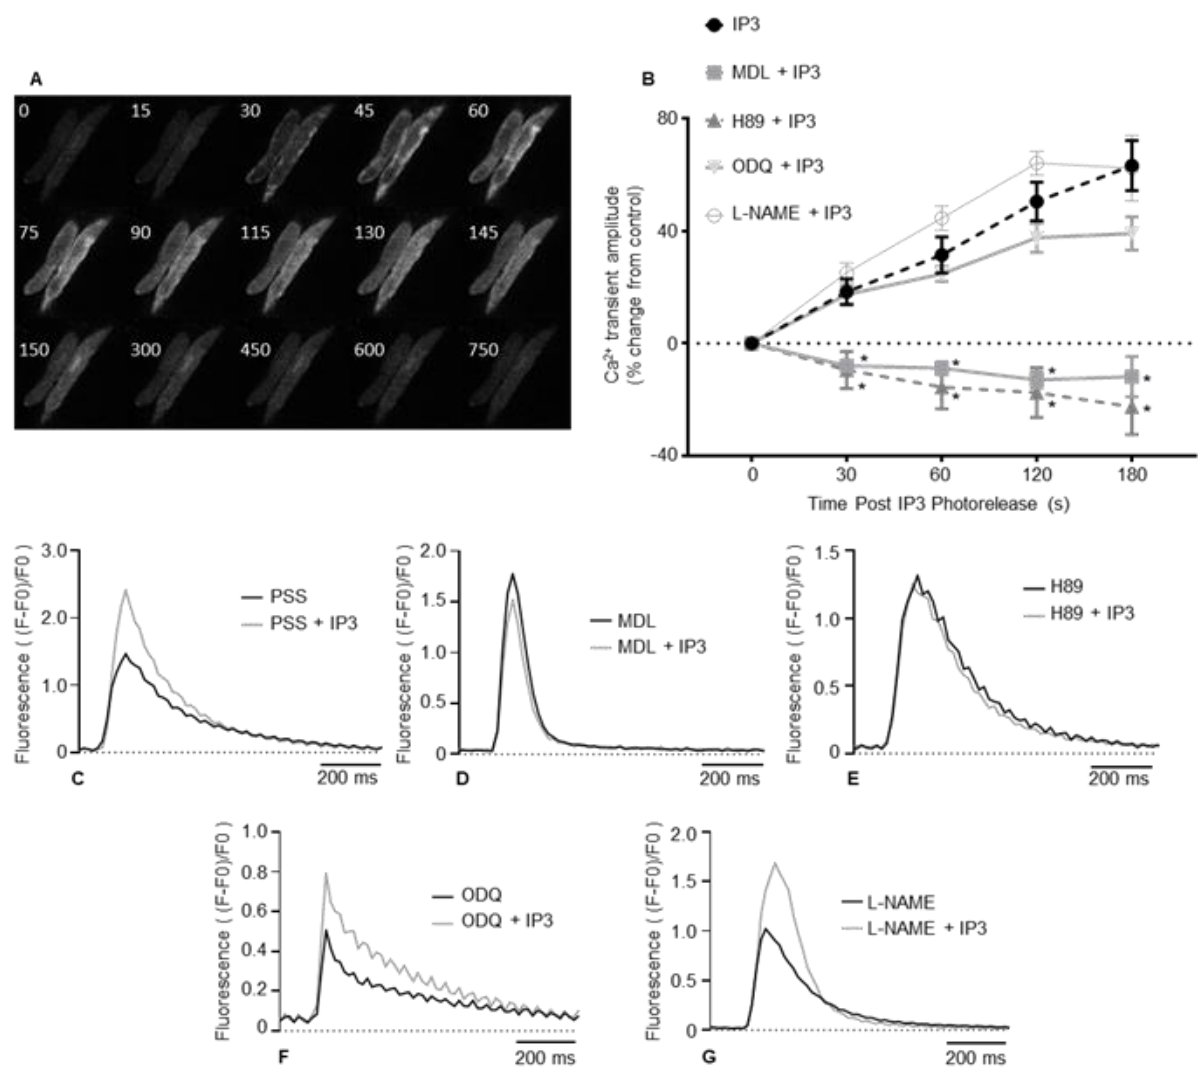

**Figure 3**

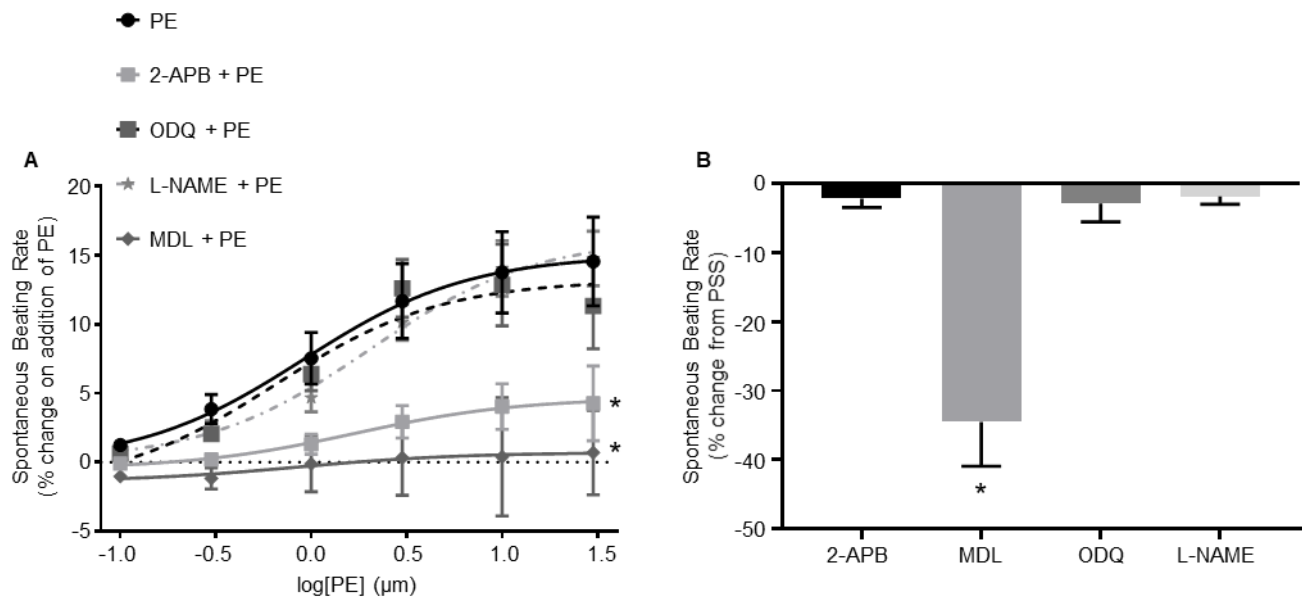

**Figure 4**

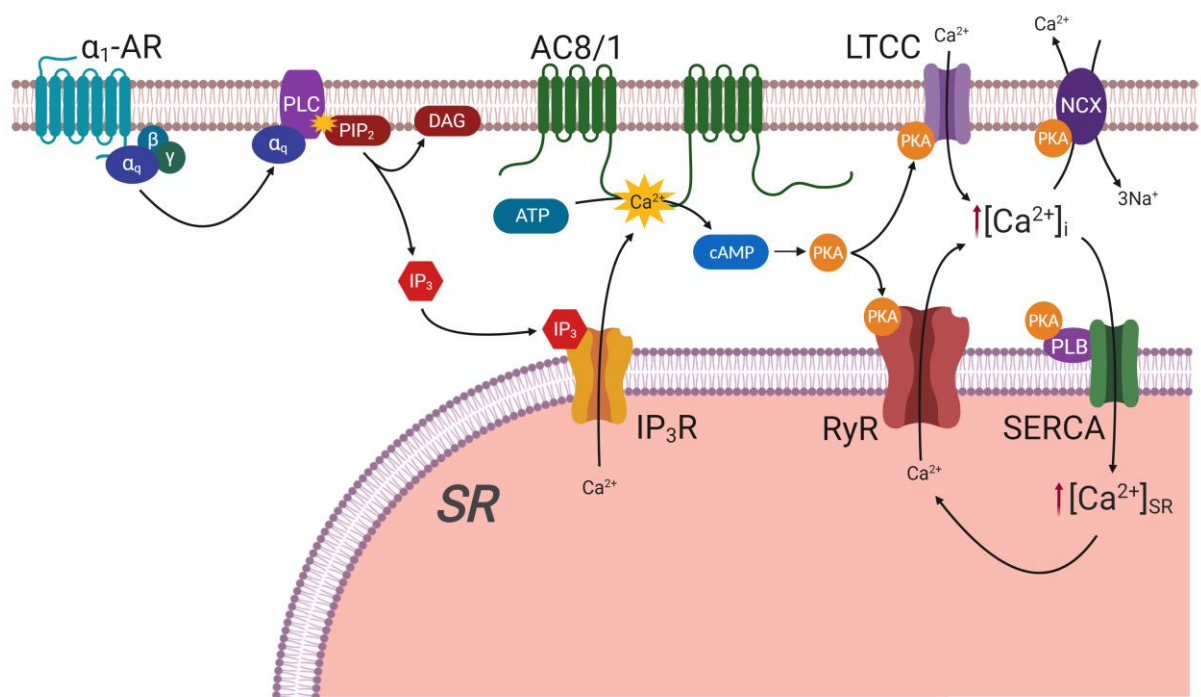

Source: https://www.biorxiv.org/content/10.1101/694349v1.full.pdf
